# Supplementary material for: Effect of preparation conditions on the structural and acid catalytic properties of protonated titanate nanotubes
Source: Royal Society of Chemistry journal article supplement (doi:10.1039/c3ta13015k), 2013-01-01
Supplement: c3ta13015k.pdf [file c3ta13015k.pdf]

## SUPPLEMENTARY INFORMATION

# Effect of Preparation Conditions on the Structural and Acid Catalytic Properties of Protonated Titanate Nanotubes

*Emiko Wada,<sup>a</sup> Masaaki Kitano<sup>b</sup> Kiyotaka Nakajima<sup>a,c</sup> and Michikazu Hara<sup>\*a,d</sup>*

<sup>a</sup>Materials and Structures Laboratory, Tokyo Institute of Technology, 4259 Nagatsuta,  
Midori-ku, Yokohama 226-8503, Japan.

<sup>b</sup>Materials Research Center for Element Strategy, Tokyo Institute of Technology, 4259  
Nagatsuta, Midori-ku, Yokohama 226-8503, Japan

<sup>c</sup> Japan Science and Technology (JST) Agency, PRESTO, 4-1-8 Honcho, Kawaguchi  
332-0012, Japan

<sup>d</sup> Japan Science and Technology (JST) Agency, ALCA, 4-1-8 Honcho, Kawaguchi  
332-0012, Japan

## Supplementary Results

**Table S1: Ion exchange capacity of various titanium oxide materials.**

| Catalyst                   | Ion exchange capacity [mmol g <sup>-1</sup> ] |     |
|----------------------------|-----------------------------------------------|-----|
|                            | Titration method <sup>a</sup>                 | ICP |
| TiO <sub>2</sub> (anatase) | 1.0                                           | 0.9 |
| HT-Ti-323                  | 1.3                                           | 1.1 |
| HT-Ti-423                  | 2.9                                           | 2.6 |
| HT-Ti-473                  | 4.4                                           | 4.2 |

<sup>a</sup>Ion exchange capacities of the samples were estimated from the exchange of Na<sup>+</sup> in aqueous 0.05 M NaOH solutions (pH = 12.7) by titration method.

**Table S2: Surface area of Na<sup>+</sup>-exchanged titanate nanotubes.**

| Catalyst                                  | Amount of NaOH added<br>[mmol g <sup>-1</sup> ] | $S_{BET}$ [m <sup>2</sup> g <sup>-1</sup> ] |
|-------------------------------------------|-------------------------------------------------|---------------------------------------------|
| Titanate nanotube                         | 0                                               | 350                                         |
| Na <sup>+</sup> -Titanate nanotube (30%)  | 0.06                                            | 352                                         |
| Na <sup>+</sup> -Titanate nanotube (50%)  | 0.11                                            | 348                                         |
| Na <sup>+</sup> -Titanate nanotube (70%)  | 0.15                                            | 337                                         |
| Na <sup>+</sup> -Titanate nanotube (100%) | 0.21                                            | 339                                         |

Numbers in parentheses show the Na<sup>+</sup> ion-exchange ratio of the titanate nanotubes. 100% means that all Brønsted acid sites are replaced by Na<sup>+</sup> ions.

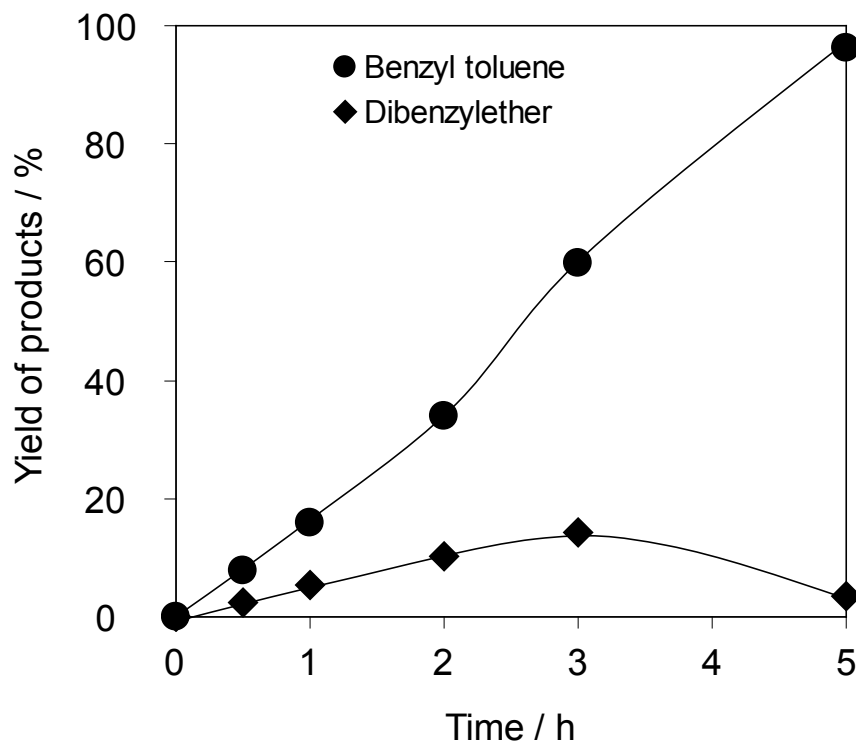

**Figure S1** Time courses of Friedel-Crafts alkylation of anisole with benzyl alcohol over HT-Ti-423. Reaction conditions: catalyst (0.2 g), anisole (0.1 mol), benzyl alcohol (0.01 mol), reaction temperature (373 K).
